# Supplementary material for: Photoacoustic measurement may significantly overestimate NH 3 emissions from cattlehouses due to VOC interferences
Source: Copernicus journal article supplement (doi:10.5194/amt-2018-412), 2019-01-31
Supplement: Supplementary file 2 [file supplementary material.docx]

Table S1. Filter specifications for the Innova 1412.

Figure S1 An example of the interferences calibration for acetic acid measured simultaneously by the PTR-MS, PAS and CRDS. AA-PTR-MS: acetic acid concentration measured by the PTR-MS; NH3-Innova: the false ammonia concentration caused by the acetic acid when measured by the Innova 1412; NH3-Piccaro: the ammonia concentration measured by CRDS.

Figure S2 Comparison of measured ammonia concentration by the Innova (PAS) and by the PTR-MS in a hybrid ventilated full-scale dairy barn during summer period. The data were obtained from the ventilation air dragged from the headspace above the manure channel.

Figure S3 Ammonia concentration measured by the PAS and the ethanol concentration measured by the PTR-MS during the same period, in the measurement campaign inside the cattle barn during winter time. The slope of 2.97 and 3.12 is generally close to the correction factor of 2.81 found in our calibration experiment for ammonia false signal by ethanol, shown in Table 1.
