# Supplementary figures and images for: Photoacoustic measurement may significantly overestimate NH 3 emissions from cattlehouses due to VOC interferences
Source: Copernicus journal article supplement (doi:10.5194/amt-2018-412), 2019-01-31

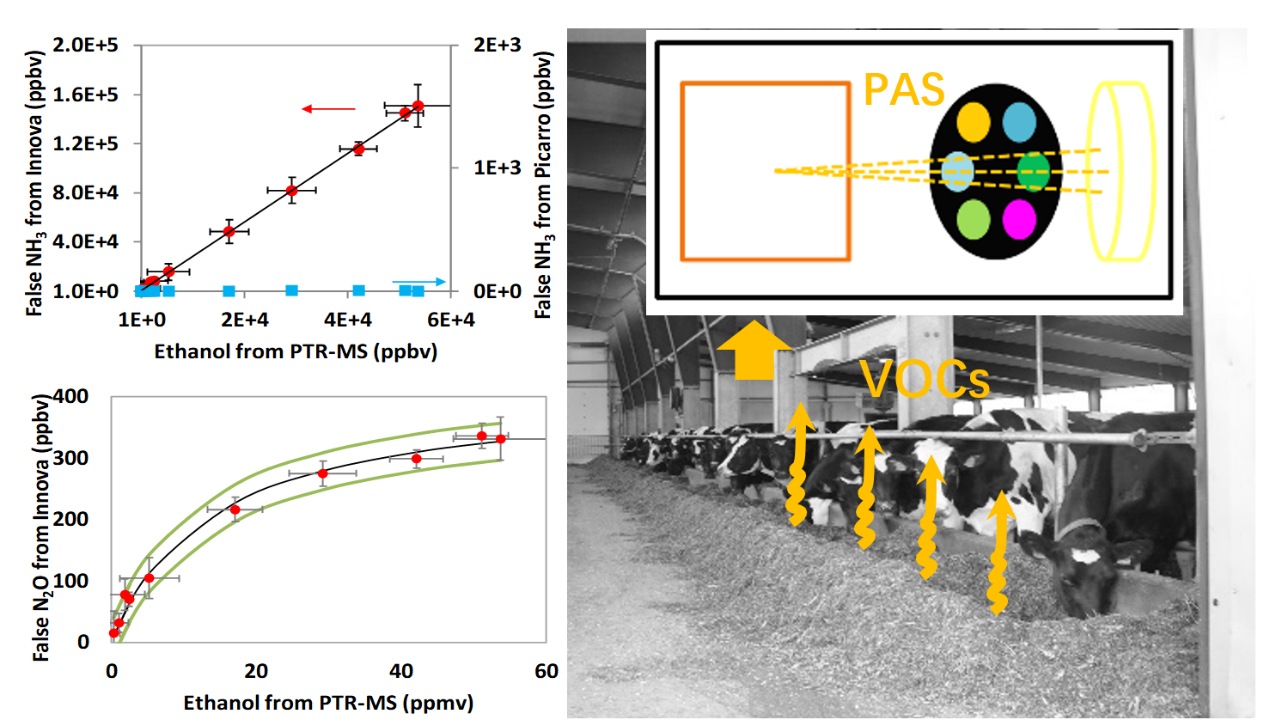


Table of Contents (TOC)

Supplement: Supplementary file 1 [file Table of Contents.docx]
